# Supplementary material
Source: Springer Nature journal article supplement (https://www.springermedizin.de/resource/supplementary/12889_2010_3548_MOESM1_ESM.pdf/9489328)
Supplement: MOESM1 [file 9489328]

**Study component I**

**Audit of prescriptions: two-stage cluster sampling method: clusters and prescriptions chosen with equal probability**

Required sample size for each of six geographical divisions, n = 720

Total facilities randomly chosen with equal probability, n = 24

Equal number of prescriptions assessed randomly per facility, n = 180

Total number of prescriptions being assessed in 24 UHCs, n = 4320

**Study component II**

**Systematic observations of injection safety practices:**  
Team members, n = 8; Total number of visits per facility, n = 7 [each facility was observed for 4 hours per visit over a period of 7 days]

Hospital facilities  
n = 24

Service providers  
n = 5 x 24 = 120

Waste handlers  
n = 2 x 24 = 48

Injection events  
n = 4 x 120 = 480

**Study component III**

**Six focus groups with doctors: convenient & network sampling**

Approached, n = 53  
Agreed, n = 46  
Attended, n = 43

**In-depth interviews: convenient & network sampling**

Doctors:  
Approached (n = 26)  
Agreed (n = 23)  
Attended (n = 18)

Injection providers:  
Approached (n = 18)  
Agreed (n = 15)  
Attended (n = 14)

Waste handlers:  
Approached (n = 7)  
Agreed (n = 6)  
Attended (n = 6)
